# Supplementary material for: A new L4 multi-sensor ice surface temperature product for the Greenland Ice Sheet
Source: Copernicus journal article supplement (doi:10.5194/tc-2021-384), 2022-02-04
Supplement: Supplementary file [file tc-2021-384-AC2-supplement.pdf]

# Response to comments from Referee #2 for TC-2021-384

## 1 General comments

- *The paper is fundamentally a comparison of several ice surface temperature products over Greenland for the calendar year 2012, assessing their relative performance against ground-based AWS (PROMICE stations) and airborne radiometers (IceBridge KT-19 profiles) for that year. The study emphasizes a new Level-4 (optimally interpolated, gap-filled, gridded) data set, describing how it is produced, compares it with several other products and validation data sets, and then uses the L4 data as an input for an SMB model to determine its effect on SMB estimates for 2012, a year with record surface melt and run-off. The paper is a bit confusing to read. The title needs to be changed because it gives the reader the impression that it will be a data-set focused paper, on the new product specifically, over an extended period. A better title might be: "Multi-sensor assessment of Ice Surface Temperature products for Greenland's 2012 melt season". And then introduce the new merged product within the Introduction. But I think that a better approach would be to convert this paper into an ESSD paper, and then write a shorter paper focused on the application of the data set to the 2012 melt season.*

We thank the reviewer for the constructive suggestion and we have partially modified the title. However, as the paper is presenting the dataset for the full 2012 year and not only the melt season, we refrain from adding that part. Furthermore, as this is a demonstration study to show what a L4 IST product can be used for, given that it can be produced for more years, we also refrain from specifying only 2012 in the title. This has now been clarified in the 1st paragraph of the discussion, lines 330-334: "In this study, infra-red observations from the reprocessed archive of the ESA LST\_cci project and

the AASTI dataset were utilised to demonstrate the capability for generating a Level 4 Ice Surface Temperature product over the Greenland Ice Sheet, based on existing long-term, homogenized datasets from space-borne sensors. The aim was to demonstrate the generation, quality and performance of the new L4 IST product compared to its single-sensor predecessors and in situ observations and finally the applicability of such a product for monitoring IST over Greenland and its utilization in a Surface Mass Budget model."

Regarding separating the manuscript, please kindly note that we refrain from doing so as manuscripts of this format are typical when introducing multi-sensor products in order to demonstrate their applicability, e.g. Høyer and Karagali, (2016). This format offers an overview of the datasets used, their performance, the new product and its performance, along with what can it be used for thus helping the readers understand how multi-sensor products are generated and how can they be utilised.

- *This paper seems to be trying to do several things at once: describe a new data product, validate it, discuss its benefits / limitations, investigate the annual cycle for the Greenland ice sheet in 2012, and finally the potential advantage of an L4 IST for SMB analysis. It would be far easier to follow the research if first there were a paper on the L4 data set for the full time-period it can cover, with multi-year validation and something like a climatology for the ice sheet – and then a study of the 2012 melt season and SMB models using it.*

Please see the response to the previous comment and the discussion in Lines 396-401: "The L4 OI IST dataset generated and presented here was the result of a user case from the ESA LST\_cci project and was only generated for the selected year of 2012 to assess the impact and applicability of such a product over the Greenland Ice Sheet. Ideally such a product can be expanded to cover the entire period of available L2 input data, thus resulting in more climatologically relevant time scales in the order of 20 to 30 years. Such a task will become significantly more relevant during the second phase of ESA LST\_cci during which the current suite of products will be improved and temporally extended and new products will be included, e.g. the AVHRSS series (NOAA 7-19 and MetOp-A/B/C)."

- *I think the paper could be close to publishable, but as an ESSD paper. The revised title suggested above would lead to a shorter,*

*application-focused, tighter paper that would not do justice to introducing the new data set and its usefulness. The major revisions required are a re-write, fairly comprehensive, to make it more focused on this 'data product' target, and to describe the full multi-year time-series that can be derived for the L4 product. A separate paper could then be developed, if desired, on the unusual climate aspects of 2012 as revealed in the IST all-sky result in Greenland, with a comparison in more detail with the existing literature on the 2012 summer there. As it stands, the manuscript seems to wander between describing a small piece of a potentially important data product (the L4 IST) and some kind of analysis of the geographic distribution of unusual temperatures in 2012. The ESSD paper would re-focus on introducing the study more clearly, and perhaps revising some of the graphics, and reducing the number of graphics (finding other ways to show the validation/ comparison information). I leave it to the editor to decide, of course, but I think the clearest path is to use most of this work for an ESSD paper, and then submit a shorter paper on analysis of 2012 to The Cryosphere. Sorry, it probably shows in this writing that my thinking on the text evolved over the couple of afternoons I reviewed it.*

Please see response to previous comment about separating the manuscript.

## **2 Detailed comments**

*Many comments are embedded in the annotated .pdf of the paper, submitted with this review.*

We have addressed them individually, please see below.

- *change to 'Level 4' for the title*

Corrected.

- *Abstract is much longer than it needs to be, rambling. 450+ words, could easily be 250.*

We have shortened the abstract.

- *Line 16: 'upstream' not needed.*

Removed.

- *Line 19: please give the total range of melt days – from 90 to 2, with the greatest e.g. in the southwest, and the area north of Summit with 0 to 1.*

The sentence refers to "almost the entire GIS" for which the range of melt-days is actually 1-5. Some parts of it - far from almost the entire GIS though - experienced high number of melt-days and this description is already mentioned in the text.

- *Line 35: 'survive as liquid' - do you mean run-off? perennial subsurface firn aquifers? this is unclear and confusing.*

Here we are referring to irreducible liquid water that fills up the pore space in the snow pack. In some parts of Greenland this also leads to the formation of perennial firn aquifers when local conditions allow. We have updated the sentence, see Lines 30-33: "Also important are processes of meltwater percolation into the snow and firn (snow that has survived at least one annual cycle) where meltwater can be retained as a liquid if there is sufficient pore space and may refreeze if the cold content is sufficient, potentially forming aerially extensive ice layers (Broeke et al., 2009; Ettema et al., 2010; Machguth et al., 2016; Reijmer et al., 2012)."

- *Line 36: author name is 'van den Broeke'.*

Corrected.

- *Line 65: change space-bourne to 'satellite'.*

Changed.

- *Table 1: 'swath' is used incorrectly - do you want to indicate the sensor swath width? then add a separate column, 'swath'. Swath widths for these satellites are in the 100s to 1000s km.*

Swath is meant to inform about the format of the data, as L2 products are in the original satellite swath format and not gridded to a regular lat/lon grid. Understanding it may cause confusion, it has been removed.

- *Line 97: no hyphen needed up-welling.*

Corrected.

- *Line 106: how wide is the kt-19 swath?*

The instrument footprint is 15 m, and this information is now included in the text, see Line 103: "Due to the high resolution footprint of the KT-19 instrument - approximately 15m at 450

above ground (Studinger, 2020) - which results in high variability of the observed radiometric surface temperature, IceBridge observations were averaged for every kilometre to make them more comparable to the lower resolution satellite data."

- *Line 113: is the word 'upstream' necessary here?*

Removed.

- *Line 132: what is the error on the comparison with PROMICE stations? The simple bias correction, adding the regional long-term offset to derive all-sky IST is concerning... different elevations are likely to have different clear-sky / all-sky biases.*

This is specifically analysed in the manuscript Nielsen-Englyst 2019, as also mentioned in the text, for different parts of the Greenland Ice Sheet. In the present manuscript, we only use PROMICE stations of the upper ablation zone and accumulation zone were used to ensure comparisons with the satellite IST were performed only over permanently snow/ice covered surfaces. Therefore the bias correction used, as derived in Nielsen-Englyst 2019, is the one for upper ablation and accumulation zones. This is all explained in the text in Lines 94-95: "Only PROMICE data from the upper ablation and accumulation zones were used to ensure that data are only acquired over permanently snow- or ice- covered surfaces."

and in lines 126-133: "The satellite products used in this study represent the clear-sky IST as the IR satellite sensors cannot observe the surface through clouds. As a result, a clear-sky bias is usually observed when comparing averaged clear-sky surface temperatures against averaged all-sky temperatures (Koenig et al., 2010; Comiso et al., 2003). Nielsen-Englyst et al. (2019) used PROMICE observations to estimate the clear-sky bias introduced when averaging using different temporal windows. Using a 72-hour averaging window, they found a clear-sky bias of  $-0.96^{\circ}\text{C}$  when PROMICE stations located in the middle/upper ablation zone and the accumulation zone were used. Here, the clear-sky bias of  $0.96^{\circ}\text{C}$  has been added to the satellite products in order to provide an estimate of the corresponding all-sky daily IST fields, which can be compared to the all-sky ISTs observed by PROMICE and IceBridge."

- *Line 145-146: seems like there is a grammar problem in this sentence.*

Corrected.

- *Line 150: straight away a bit colloquial, use 'immediately'.*  
Corrected.
- *Line 170: colder IST change to 'lower' - temperatures are high or low, not warm or cold.*  
Corrected.
- *Line 176: why? just eliminate April for this data set.*  
Corrected and removed, see updated figure 4 and line 184-185: "AATSR was only available until the beginning of April, thus no monthly value was calculated."
- *Table 3: change this table note to read: Winter mean temperatures were determined by averaging January, February and December of 2012.*  
Modified.
- *Line 191: Please describe the problem with the cloud mask - e.g., it does not eliminate cirrus cloud well enough?*  
Please see description in Lines 203-207: "The primary reason for the lower LST\_cci v1.0 MODIS and AATSR IST values, used in the present study, is the type of cloud masking applied in the first version of the data. No post-filtering or implementation of the cloud masking techniques (later developed within the LST\_cci for both instruments) were applied in the v1.0 of the data presented here but only the standard operational cloud mask; this frequently failed to properly flag clouds, which are typically colder, resulting in lower surface temperature values."
- *Figure 2 – why is this a wintertime assessment when this study is about a melt season excerpt of the product? Would not an April 2012 comparison be more appropriate?*  
The study is not about the melt season, as the product is made, validated and analysed for the entire year of 2012. The reason 2012 was selected is because a significant melt event occurred and this is clarified in the abstract, introduction and discussion. Figure 2 aims to demonstrate the added value of the L4 product compared to single-sensor datasets in terms of spatial coverage. The wintertime example is relevant as cloud cover, impervious to IR radiation, is higher. This is also explained in the text, see line 166: "The L3 products are aggregated for January 9, 2012 - winter time when cloud cover, impervious to IR radiation, is higher - into the L3S product (bottom left) ..."

- *Figure 4: widen this graphic so that you can make it more clear that you are clustering the monthly means with slight offsets for the different data sets. Remove April for AASTR since it is a partial month.*

Done.

- *Figure 6: perhaps use a table for this presentation.*

We have removed this figure and added a table instead.

- *Figure 7: I don't see the value in this kind of detail – would it not be better to simply describe the overall bias for each IST data type relative to the 2012 IceBridge flights? Another graphical, map-based way to do this would be 4 outline maps of Greenland, one for each IST data type, with the flight tracks shown, colored along the track by offset (difference between IST and KT-19) smoothed to, e.g. 10km, on each track. Really clever addition would be to show the s.d. for the 10km as a grey width to the colored line. That, and a table summarizing the whole-season 28-flight average bias and offset.*

Due to the amount of available flight tracks (see new Figure 1, with map of Greenland and all IceBridge flights), plotting all 28 in one figure per dataset, along with the standard deviation as a shaded area around each flight path results to an incomprehensible figure due to the overlaps. Therefore, we refrain from adding such a figure. Furthermore, the graphical representation of the biases per flight campaign and product, as described in Lines 243-245 serves to demonstrate the variability from campaign to campaign which is, e.g., significantly more pronounced for MODIS, see: "MODIS was cold compared to the flight measurements, manifested as a negative bias ( $-5.19^{\circ}\text{C} \pm 4.8^{\circ}\text{C}$ ), and with a pronounced variability during the period evident from the oscillating bias (from  $-14.15^{\circ}\text{C}$  to  $2.20^{\circ}\text{C}$ ) and standard deviation values (from  $2^{\circ}\text{C}$  to  $7.2^{\circ}\text{C}$ )."

- *Figure 8: This might be merged with a condensed version of Figure 7, as I suggested in my note for Fig7.*

Please see response above and modified Figure 8, where the map with the single IceBridge Flight has been omitted and all IceBridge flights have been presented in the modified Figure 1.

- *Figure 10: This graphic would only be of use in a data description paper; its not really useful in a Cryosphere paper.*

The figure aimed to provide information about the number of observations available to generate the L3S and L4 products

which is then used to derive the mean values shown in Figure 9. Nonetheless, it has now been removed and its information conveyed through text.

- *Figure 11: the left graphic might be better as an addition to a re-shaped fig9; the center and right graphics here are a nice outcome of the L4 product, but are more appropriate for an analysis of the 2012 melt season in comparison with other melt-day product. On this point, the color bar for the right graphic should be revised to a different palette, and adjusted to show the 0 to 50 day range more clearly. It would appear that the total number of melt days is low relative to other measures of 2012's melt season – something to evaluate in your 2012 analysis paper.*

As mentioned above, since we refrain from separating the manuscript in two, the figure remains as is originally. Nonetheless, we have modified the color schemes to different palettes so now the right panel has the max number of available melt days maintained and an intense color transition at 50 days so the 0-50 days is more visible.

- *Figure 12: not terribly important, but the projection is rotated several degrees ccw here.*

Corrected (now figure 11, since a figure has been omitted as per a previous comment).

- *Figure 13: I think this is better presented in a map view so that readers can incorporate geography into their assessment of the results.*

This figure was complementary to figure 6, which has been turned into a table according to the reviewer's request and thus, also to align with the comment about many figures, we also modified this figure to a table. Please do keep in mind that the geographical information of where the PROMICE stations are located is conveyed in Figure 1 of the manuscript (left panel).

- *Figure 14: I just don't think this graphic is informative without a lot of work on the reader's part to examine the flight paths, presence of clouds, weather that day... is there more information for the analysis than the bias and SD reported at the lower right of the graphs?*

This figure is presented in a similar way as for the comparisons of the satellite data with the IceBrige campaigns (Figure 7). It can provide useful information on the variability of the campaigns and the performance of the two types of simulations,



therefore to maintain the consistency with the presentation of validation results we refrain from removing it. Please also refer to response about Figure 7.

- *Figure 15: Perhaps you could pick 3 or 4 flights with a story to tell, and show those, with the map at the right side. Lots of white space in this.*

We have modified this figure (now figure 13) to be in alignment with Figure 8.

- *In general, too many figures of low value in the information and 'story' they convey.*

We have converted some of the figures to tables and have removed some, yet we have included some new due to the request of Reviewer 1, thus the total number is now reduced to 13 from 15 in the original version.

- *Line 321: 2012 in reference?*

It is actually Table 1 of the 2013 paper, as is already mentioned in the text.

- *Line 339: did you mean to say 'not very similar' here? otherwise there is a logical problem with the next sentence.*

The spectral response functions (SRF) of the KT-19 instrument are similar to the satellite IR SRF, nonetheless its footprint is not, thus the next sentence "Therefore, the results from the inter-comparison should not be viewed as an estimate of the uncertainty of the satellite products." is actually valid. The text has now slightly been modified, please see lines 352-355: "In addition, although the Spectral Response Functions (SRFs) of the IceBridge KT19 instrument are very similar to the actual IR satellite SRFs, the instrument footprints are different. Therefore, the results from the inter-comparison should not be viewed as an estimate of the uncertainty of the satellite products."

- *Line 355-356: add what ?Hall et al., 2013? reported as the average summer MODIS IST for Greenland (multi-year).*

This has been modified for clarity, see lines 374-376: "Hall et al. (2013) reported more than two melt days for most of the GIS during the melt season of 2012, based on MODIS data, which also indicated the warmest summer in the MODIS record with mean IST of  $-6.38 \pm 3.98^\circ\text{C}$ , in good agreement with the mean summer IST from the L4 IST product reported in Table 3."

- *Its a good paper, well-written, but its trying to surf the boundary between a data paper and a science study.*

We very much thank the reviewer for the time used to read this manuscript and for the constructive comments. We have tried to clarify this point in the discussion, see Lines 330-334:"In this study, infra-red observations from the reprocessed archive of the ESA LST\_cci project and the AASTI dataset were utilised to demonstrate the capability for generating a Level 4 Ice Surface Temperature product over the Greenland Ice Sheet, based on existing long-term, homogenized datasets from satellite sensors. The aim was to demonstrate the generation, quality and performance of the new L4 IST product compared to its single-sensor predecessors and in situ observations and finally the applicability of such a product for monitoring IST over Greenland and its utilization in a Surface Mass Balance model."

and Lines 396-401: "The L4 OI IST dataset generated and presented here was the result of a user case from the ESA LST\_cci project and was only generated for the selected year of 2012 to assess the impact and applicability of such a product over the Greenland Ice Sheet. Ideally such a product can be expanded to cover the entire period of available L2 input data, thus resulting in more climatologically relevant time scales in the order of 20 to 30 years. Such a task will become significantly more relevant during the second phase of ESA LST\_cci during which the current suite of products will be improved and temporally extended and new products will be included, e.g. the AVHRSS series (NOAA 7-19 and MetOp-A/B/C). "
